# Supplementary material for: Ternary CBe4Au4 cluster: a 16-electron system with quasi-planar tetracoordinate carbon
Source: Royal Society of Chemistry journal article supplement (doi:10.1039/c7cp08420j), 2018-01-01

## SUPPLEMENTARY INFORMATION

### Ternary CBe<sub>4</sub>Au<sub>4</sub> Cluster: A 16-Electron System with Quasi-Planar Tetracoordinate Carbon†

Jin-Chang Guo,<sup>‡ab</sup> Lin-Yan Feng<sup>‡b</sup> and Hua-Jin Zhai<sup>\*b</sup>

<sup>a</sup>*Department of Chemistry, Xinzhou Teachers University, Xinzhou 034000, Shanxi, China*

<sup>b</sup>*Nanocluster Laboratory, Institute of Molecular Science, Shanxi University, Taiyuan 030006, China*

E-mail: hj.zhai@sxu.edu.cn

‡ These authors contributed equally to this work.

**Table S1.** Orbital composition analysis of canonical molecular orbitals (CMOs) of the global-minimum structure **1** ( $C_{4v}$ ,  $^1A_1$ ) of CBe<sub>4</sub>Au<sub>4</sub> cluster.

**Table S2.** Orbital composition analysis of delocalized  $\pi$  CMOs of the  $C_{4v}$  CBe<sub>4</sub>M<sub>4</sub> (M = K, Au, H, Cl) series of quasi-planar tetracoordinate carbon (quasi-ptC) clusters.

**Table S3.** Orbital composition analysis of HOMOs of the  $T_d$  CBe<sub>4</sub>M<sub>4</sub> (M = K, Au, H, Cl) series of tetrahedral carbon (thC) clusters.

**Figure S1.** Optimized ptC or quasi-ptC global-minimum structures **1–3** of CBe<sub>4</sub>Au<sub>4</sub><sup>0/-2-</sup> clusters and their three lowest-lying isomers (**nB–nD**) at the B3LYP/def2-TZVP level. Relative energies are listed in kcal mol<sup>-1</sup> at the single-point CCSD(T) level, with zero-point energy (ZPE) corrections at B3LYP.

- Figure S2.** Wiberg bond indices (WBIs) for **1–3** of  $\text{CBe}_4\text{Au}_4^{0/-/2-}$  clusters from natural bond orbital (NBO) analyses.
- Figure S3.** Selected optimized salt complexes,  $\text{CBe}_4\text{Au}_4\text{Na}^-$  and  $\text{CBe}_4\text{Au}_4\text{Na}_2$  at B3LYP/def2-TZVP level, which are based on dianion  $\text{CBe}_4\text{Au}_4^{2-}$  (**3**) cluster.
- Figure S4.** WBIs for selected structures of  $\text{CAI}_4^{0/-/2-}$  clusters (**4–8**).
- Figure S5.** Optimized quasi-ptC  $C_{4v}$  structures **9–11** of  $\text{CBe}_4\text{M}_4$  ( $\text{M} = \text{K}, \text{H}, \text{Cl}$ ) and their  $T_d$  counterparts at the B3LYP/def2-TZVP level, as compared to those of  $\text{CBe}_4\text{Au}_4$  and  $\text{CAI}_4$ . Bond distances are given in angstroms. Natural atomic charges (in  $|e|$ ) are shown in *italic* in red color. Relative energies are listed in  $\text{kcal mol}^{-1}$  at the single-point CCSD(T) level, with zero-point energy (ZPE) corrections at B3LYP.
- Figure S6.** WBIs for selected structures of  $\text{CBe}_4\text{M}_4$  ( $\text{M} = \text{K}, \text{Au}, \text{H}, \text{Cl}$ ) and  $\text{CAI}_4$ .
- Figure S7.** Nucleus independent chemical shifts (NICSs) for clusters **1–3**. NICS(0) is calculated at the center of a triangle. NICS(1), shown in red color, is calculated at 1 Å above the center of a triangle or above the C center.
- Figure S8.** Canonical molecular orbitals (CMOs) of two typical structures of the 16-electron  $\text{CAI}_4$  cluster. (a)  $C_{2v}$  (**5**). (b)  $T_d$  (**4**).

**Table S1.** Orbital composition analysis of canonical molecular orbitals (CMOs) of the global-minimum structure **1** ( $C_{4v}$ ,  $^1A_1$ ) of  $CBe_4Au_4$  cluster. Main components are shown in bold.

| Subsystem                  | CMO                                                                                                      | C (%)           |             | Be <sub>4</sub> (%) |             | Au <sub>4</sub> (%) |             |
|----------------------------|----------------------------------------------------------------------------------------------------------|-----------------|-------------|---------------------|-------------|---------------------|-------------|
|                            |                                                                                                          | s/p             | total       | s/p                 | total       | s/d                 | total       |
| LUMO                       | 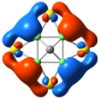<br>LUMO ( $b_1$ )      | 0.0/0.0         | 0.0         | <b>23.5/57.3</b>    | <b>80.8</b> | 0.0/19.2            | <b>19.2</b> |
| Be-Au-Be<br>3c-2e $\sigma$ | <br>HOMO-2 ( $b_2$ )    | 0.0/0.0         | 0.0         | 0.0/29.4            | <b>29.4</b> | <b>48.0/22.6</b>    | <b>70.6</b> |
|                            | <br>HOMO-1 ( $e$ )      | 0.0/33.2        | <b>33.2</b> | 2.7/18.5            | <b>21.2</b> | <b>40.5/5.1</b>     | <b>45.6</b> |
|                            | <br>HOMO-3 ( $a_1$ )  | 1.8/0.5         | 2.3         | <b>15.4/4.5</b>     | <b>19.9</b> | <b>32.2/45.6</b>    | <b>77.8</b> |
| 2 $\pi$<br>aromaticity     | <br>HOMO ( $a_1$ )    | 5.2/55.2        | <b>60.4</b> | 2.3/23.5            | <b>25.8</b> | 3.0/10.8            | <b>13.8</b> |
| 6 $\sigma$<br>aromaticity  | <br>HOMO-19 ( $e$ )   | 0.0/31.7        | <b>31.7</b> | 7.2/15.9            | <b>23.1</b> | 9.1/36.1            | <b>45.2</b> |
|                            | <br>HOMO-20 ( $a_1$ ) | <b>59.6/3.1</b> | <b>62.7</b> | <b>14.9/19.3</b>    | <b>34.2</b> | 1.3/1.8             | 3.1         |

**Table S2.** Orbital composition analysis of delocalized  $\pi$  CMOs of the  $C_{4v}$   $CBe_4M_4$  ( $M = K, Au, H, Cl$ ) series of quasi-planar tetracoordinate carbon (quasi-ptC) clusters. Main components are shown in bold.

| $CBe_4M_4$  | CMO                                                                                                              | C (%)            |             | $Be_4$ (%)       |             | $M_4$ (%)        |             |
|-------------|------------------------------------------------------------------------------------------------------------------|------------------|-------------|------------------|-------------|------------------|-------------|
|             |                                                                                                                  | s/p              | total       | s/p              | total       | s/p,d            | total       |
| $CBe_4K_4$  | <br>HOMO-3 ( $a_1$ )            | 2.5/ <b>62.5</b> | <b>65.0</b> | 4.8/ <b>29.1</b> | <b>33.9</b> | 1.0/0.1          | 1.1         |
| $CBe_4Au_4$ | <br>HOMO ( $a_1$ ) <sup>a</sup> | 5.2/ <b>55.2</b> | <b>60.4</b> | 2.3/ <b>23.5</b> | <b>25.8</b> | 2.9/ <b>10.9</b> | <b>13.8</b> |
| $CBe_4H_4$  | <br>HOMO ( $a_1$ )              | 4.1/ <b>48.2</b> | <b>52.3</b> | 8.8/ <b>31.9</b> | <b>40.7</b> | 7.0/0.0          | 7.0         |
| $CBe_4Cl_4$ | <br>HOMO ( $a_1$ )            | 3.6/ <b>59.4</b> | <b>63.0</b> | 1.7/ <b>20.8</b> | <b>22.5</b> | 0.0/ <b>14.5</b> | <b>14.5</b> |

<sup>a</sup> HOMO of  $CBe_4Au_4$  is the most delocalized among all species listed, with major components from C,  $Be_4$ , and  $Au_4$ . Such delocalization, even with formally antibonding contribution from  $Au_4$  (due to energy mismatch between atomic orbitals of Be and Au), helps stabilize the  $2\pi$  system. It is the extent of spatial delocalization that matters.

**Table S3.** Orbital composition analysis of HOMOs of the  $T_d$   $CBe_4M_4$  ( $M = K, Au, H, Cl$ ) series of tetrahedral carbon (thC) clusters. Main components are shown in bold.

| $CBe_4M_4$  | CMO <sup>a</sup>                                                                                                 | C (%)            |             | Be <sub>4</sub> (%) |             | M <sub>4</sub> (%) |             |
|-------------|------------------------------------------------------------------------------------------------------------------|------------------|-------------|---------------------|-------------|--------------------|-------------|
|             |                                                                                                                  | s/p              | total       | s/p                 | total       | s/p,d              | total       |
| $CBe_4K_4$  | 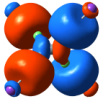<br>HOMO ( $t_2$ )              | 0.0/3.8          | 3.8         | <b>31.9/30.9</b>    | <b>62.8</b> | <b>32.8/0.6</b>    | <b>33.4</b> |
| $CBe_4Au_4$ | <br>HOMO ( $t_2$ )              | 0.00/4.1         | 4.1         | 7.5/ <b>12.7</b>    | <b>20.2</b> | <b>59.1/16.6</b>   | <b>75.7</b> |
| $CBe_4H_4$  | <br>HOMO ( $t_2$ ) <sup>b</sup> | 0.0/ <b>35.6</b> | <b>35.6</b> | 3.1/ <b>17.4</b>    | <b>20.5</b> | <b>43.9/0.0</b>    | <b>43.9</b> |
| $CBe_4Cl_4$ | <br>HOMO ( $t_2$ )            | 0.0/ <b>33.6</b> | <b>33.6</b> | 2.3/1.7             | 4.0         | 0.0/ <b>62.4</b>   | <b>62.4</b> |

<sup>a</sup> HOMO orbitals of  $T_d$   $CBe_4M_4$  ( $M = K, Au, H, Cl$ ) clusters are triply degenerate, and only one component is depicted and compared in the table.

<sup>b</sup> Compared to those of other species, HOMO of  $T_d$   $CBe_4H_4$  has prominent C-Be-H  $\sigma$  conjugation with major orbital components from C, Be<sub>4</sub>, and H<sub>4</sub>. This effect stabilizes  $T_d$   $CBe_4H_4$  as the global minimum, in contrast to  $CBe_4Au_4$  that has  $C_{4v}$  geometry (see Fig. 7 and also footnote in Table S2).

**Figure S1.** Optimized ptC or quasi-ptC global-minimum structures **1–3** of  $\text{CBe}_4\text{Au}_4^{0/-2-}$  clusters and their three lowest-lying isomers (**nB–nD**) at the B3LYP/def2-TZVP level. Relative energies are listed in  $\text{kcal mol}^{-1}$  at the single-point CCSD(T) level, with zero-point energy (ZPE) corrections at B3LYP.

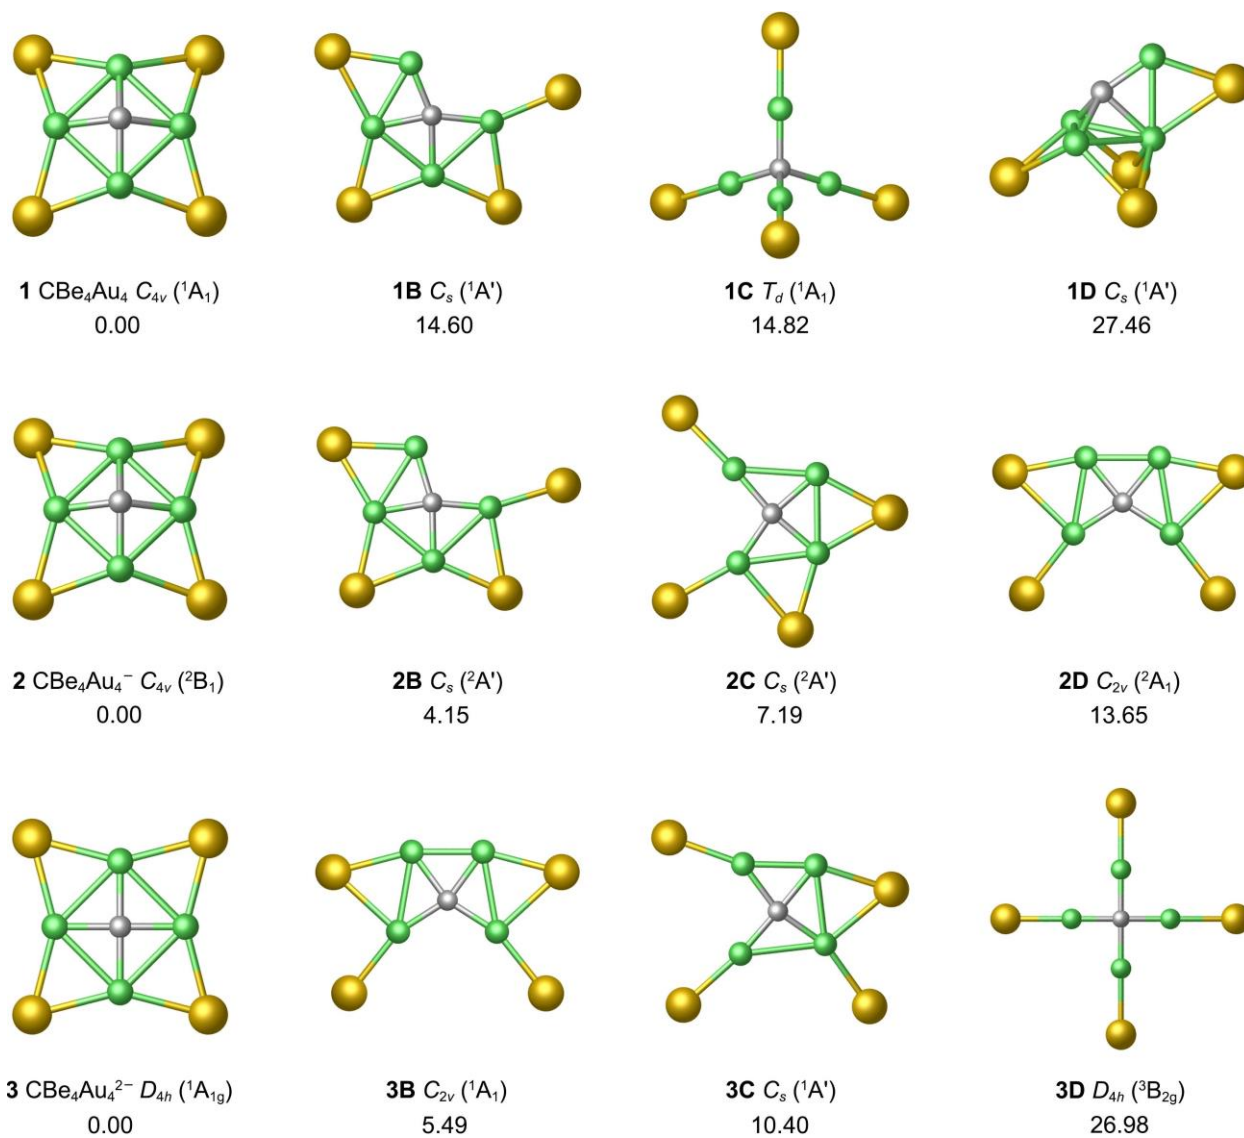

**Figure S2.** Wiberg bond indices (WBIs) for **1–3** of  $\text{CBe}_4\text{Au}_4^{0/-/2-}$  clusters from natural bond orbital (NBO) analyses.

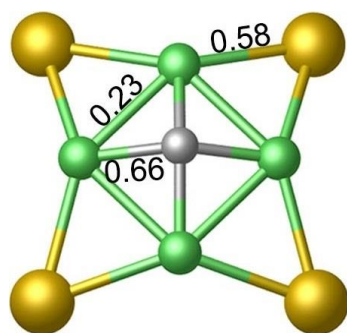

**1**  $C_{4v}$   $\text{CBe}_4\text{Au}_4$

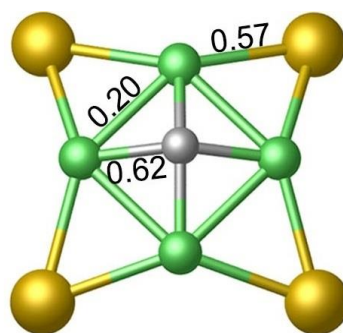

**2**  $C_{4v}$   $\text{CBe}_4\text{Au}_4^-$

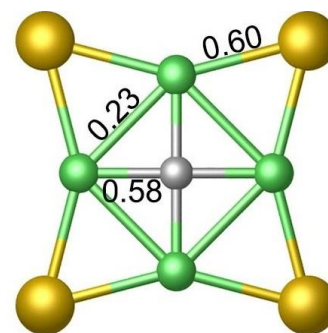

**3**  $D_{4h}$   $\text{CBe}_4\text{Au}_4^{2-}$

**Figure S3.** Selected optimized salt complexes,  $\text{CBe}_4\text{Au}_4\text{Na}^-$  and  $\text{CBe}_4\text{Au}_4\text{Na}_2$  at B3LYP/def2-TZVP level, which are based on dianion  $\text{CBe}_4\text{Au}_4^{2-}$  (**3**) cluster.

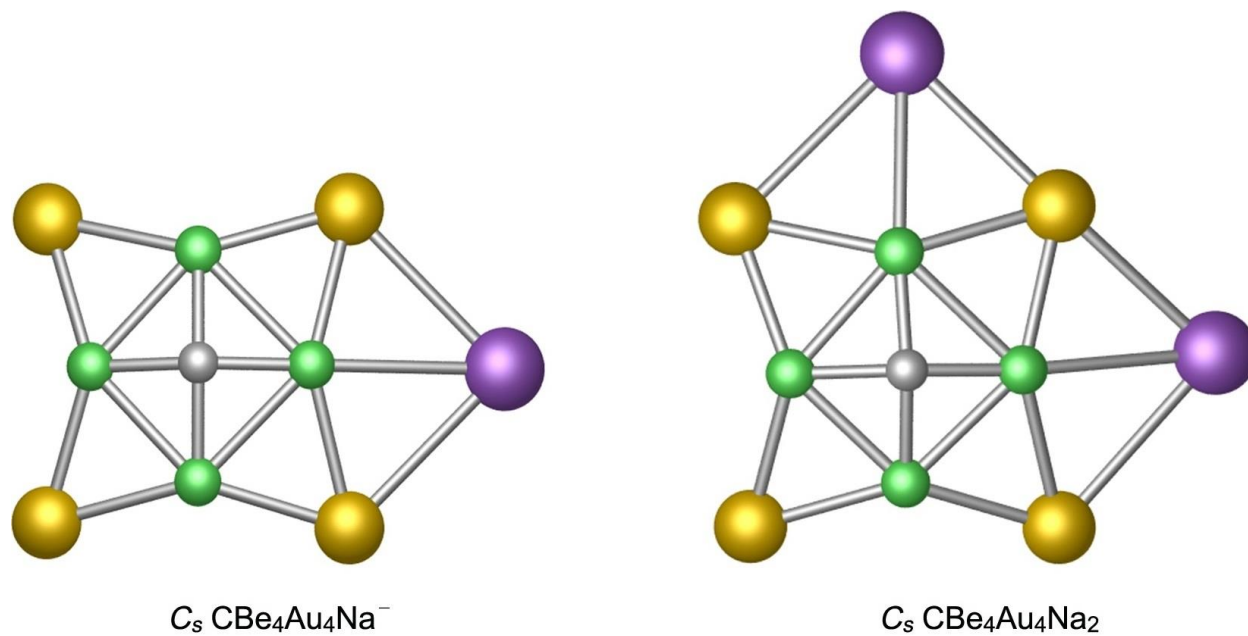



**Figure S4.** WBIs for selected structures of  $\text{CaI}_4^{0/-/2-}$  clusters (**4–8**).

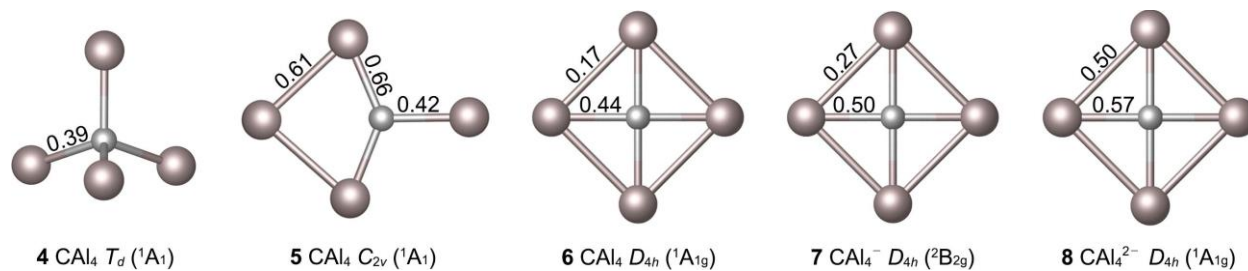

**Figure S5.** Optimized quasi-ptC  $C_{4v}$  structures **9–11** of  $CBe_4M_4$  ( $M = K, H, Cl$ ) and their  $T_d$  counterparts at the B3LYP/def2-TZVP level, as compared to those of  $CBe_4Au_4$  and  $CAI_4$ . Bond distances are given in angstroms. Natural atomic charges (in  $|e|$ ) are shown in *italic* in red color. Relative energies are listed in kcal mol<sup>-1</sup> at the single-point CCSD(T) level, with zero-point energy (ZPE) corrections at B3LYP.

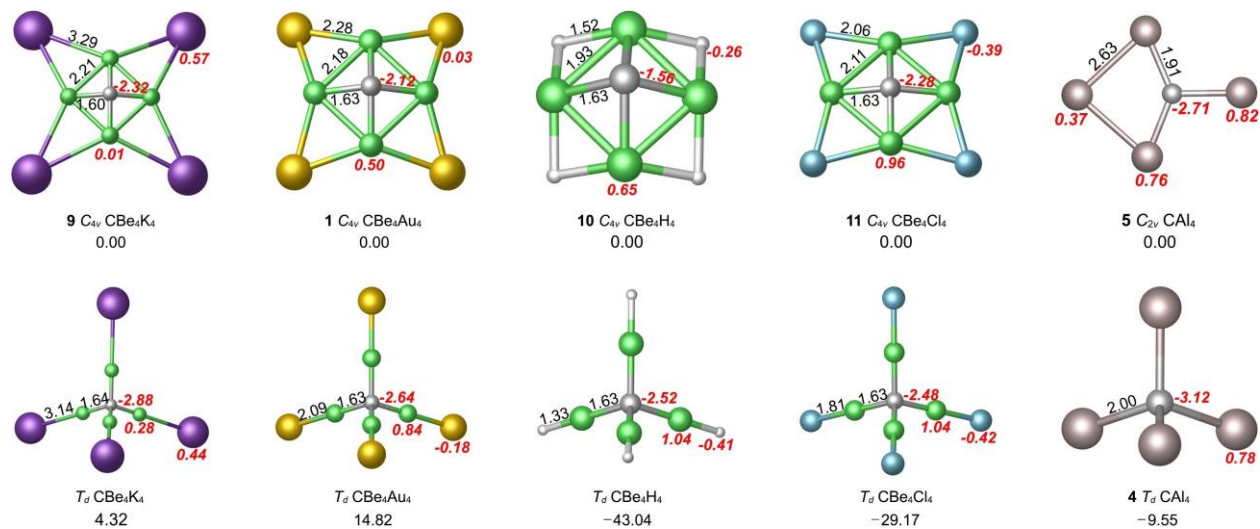

**Figure S6.** WBIs for selected structures of  $\text{CBe}_4\text{M}_4$  ( $\text{M} = \text{K}, \text{Au}, \text{H}, \text{Cl}$ ) and  $\text{CAI}_4$ .

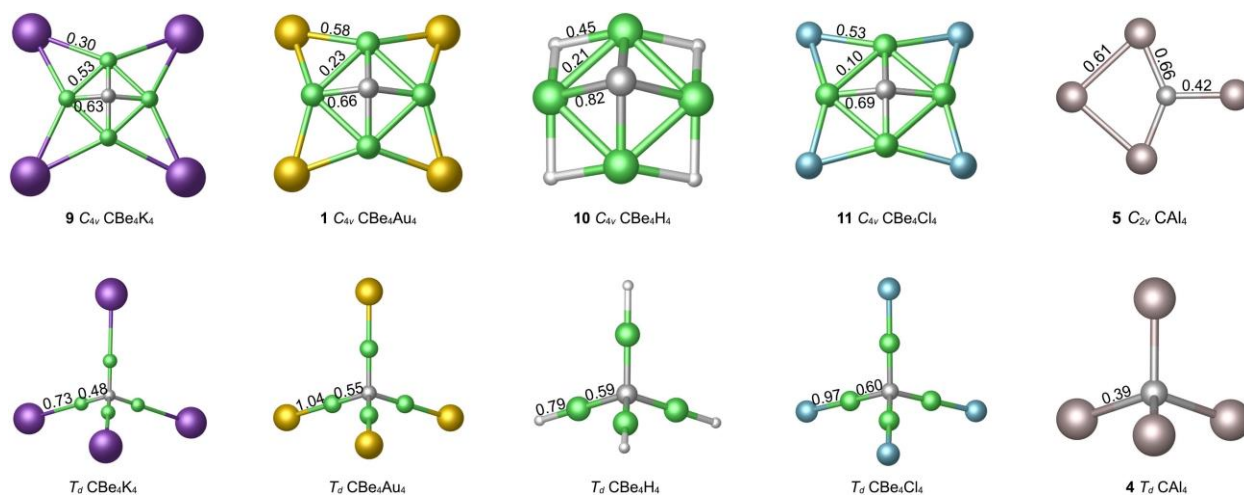

**Figure S7.** Nucleus independent chemical shifts (NICSs) for clusters **1–3**. NICS(0) is calculated at the center of a triangle. NICS(1), shown in red color, is calculated at 1 Å above the center of a triangle or above the C center.

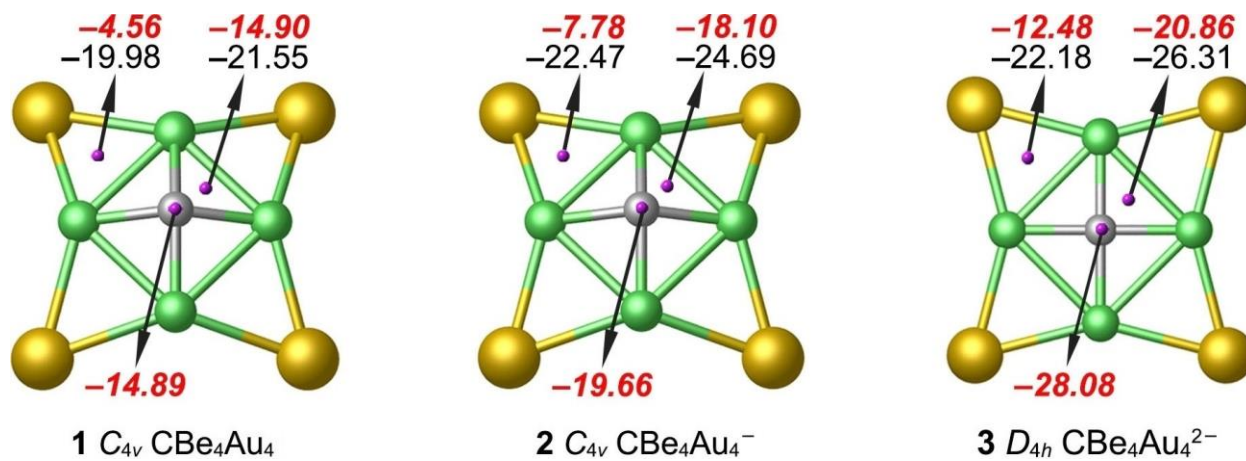

**Figure S8.** Canonical molecular orbitals (CMOs) of two typical structures of the 16-electron  $\text{CaI}_4$  cluster. (a)  $C_{2v}$  (**5**). (b)  $T_d$  (**4**).

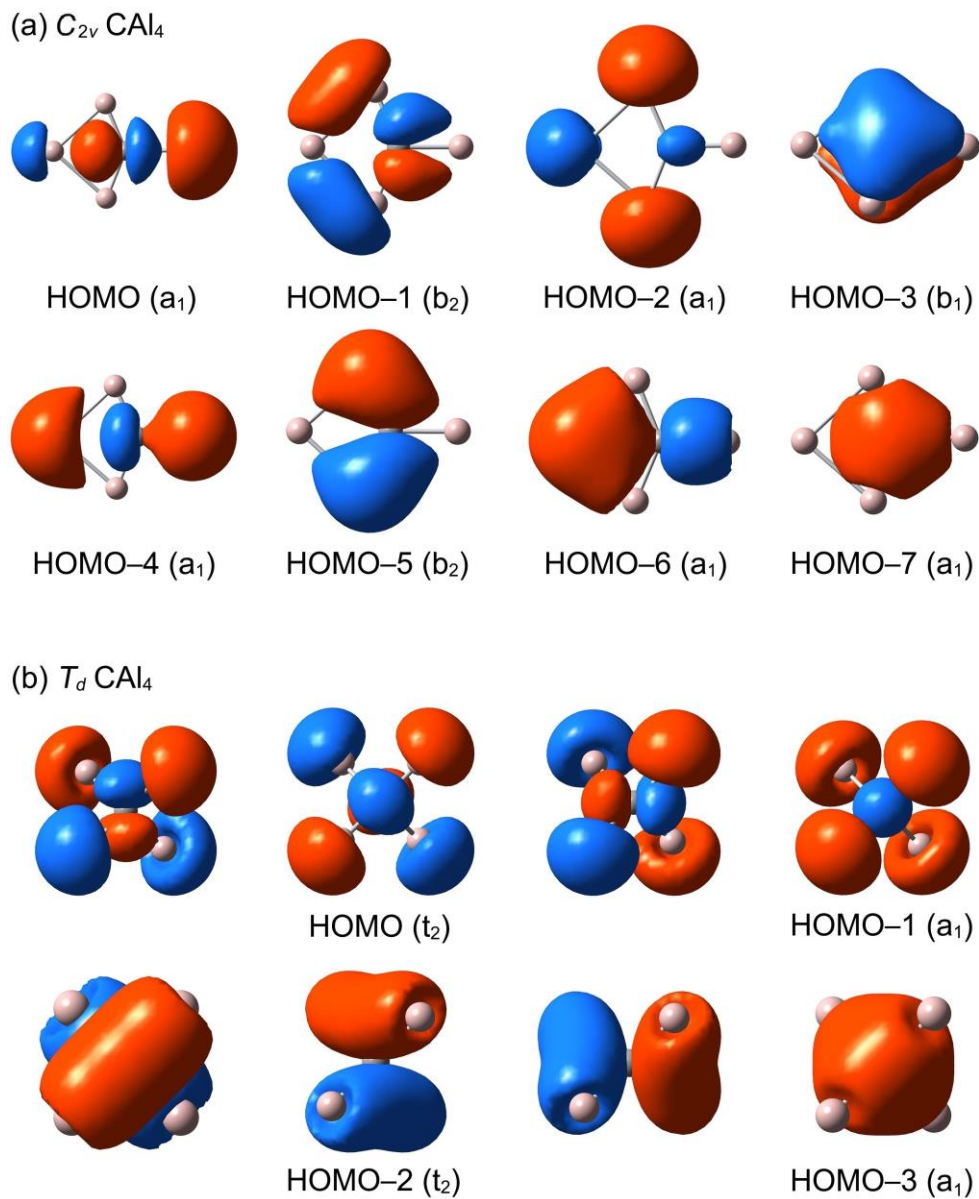

Supplement: c7cp08420j1.pdf [file c7cp08420j1.pdf]
